# Supplementary material for: The Small Ras Superfamily GTPase Rho4 of the Maize Anthracnose Fungus Colletotrichum graminicola Is Required for β-1,3-glucan Synthesis, Cell Wall Integrity, and Full Virulence
Source: MDPI journal article supplement (doi:10.3390/jof8100997), 2022-09-22
Supplement: s1 [file s1]

Oliveira-Garcia et al. (2022)

# Supplementary Materials:

Table S1. PCR primers used in this study.

|                     |                                                            |
|---------------------|------------------------------------------------------------|
| Nourse1pNR1-fw      | 5'-TGACCGGTGCCTGGATCTTCCTATAGAATC-3'                       |
| Nourse2pNR1-rv      | 5'-GGTCGGCATCTACTCTATTCCCTTGCCCTC-3'                       |
| CgPrho4-fw          | 5'-GCCAGTGGAATTCTGATTGC-3'                                 |
| CgPrho4_5'-flank-rv | 5'-GAATGCGGCTCTAGAGCGGCGGCAGACTCTAAGTGGTGTG-3'             |
| CgTrho4_3'-flank-fw | 5'-CTTAATGATGATTACTAACAGATATCAAGCTTAACCTCAGTCACCGCTCCTC-3' |
| CgTrho4-rv          | 5'-ACCCAATGCTGCTACAGGAG-3'                                 |
| CgPrho4nest-fw      | 5'-GATGGAAGCGTTCCTTCTTG-3'                                 |
| CgTrho4nest-rv      | 5'-CCCGAGTGTCTAGGTATGGTACG-3'                              |
| CgRho4probe-fw      | 5'-TTTACACTTGCCCTCCTTGC-3'                                 |
| CgRho4probe-rv      | 5'-CGGCAGACTCTAAGTGGTGTG-3'                                |
| CgRho4-RT-PCR-fw    | 5'-GGCGACGGTGGTTGCG-3'                                     |
| CgRho4-RT-PCR-rv    | 5'-CCAGACGGCGGGTGTGT-3'                                    |
| Cg_ITS2-F1.1        | 5'-CGTCGTAGGCCCTTAAAGGTAG-3'                               |
| Cg_ITS2-R1          | 5'-TTACGGCAAGAGTCCCTC-3'                                   |

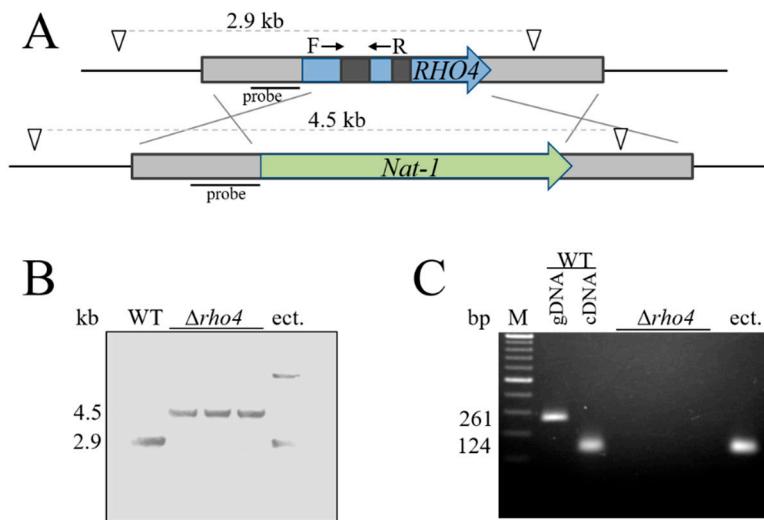

**Figure S1.** Deletion of *RHO4* of *C. graminicola* and identification of transformants with homologous and ectopic integration of the deletion cassette. **(A)** Deletion strategy of *RHO4* of *C. graminicola*. The gene *RHO4* is given in blue, introns are given in dark grey, 5'- and 3'-flanking regions in light grey. *Nat-1*, nourseothricin N-acetyl transferase gene. White arrowheads indicate *XhoI* restriction sites, black arrows labelled with F and R indicate positions of forward and reverse PCR primers. Black line below bars indicates position of the probe used in Southern blot analysis. **(B)** Southern blot analysis of the WT strain, the  $\Delta\rho4$  strains, and ectopic strains. **(C)** RT-PCR confirming the presence of *RHO4* transcripts in the WT strain and the ectopic strain, as well as the absence of *RHO4* transcripts in three randomly chosen  $\Delta\rho4$  strains. cDNA, complementary DNA;  $\Delta\rho4$ , deletion mutants; ect., ectopic strain; gDNA, genomic DNA; M, DNA size standard; WT, wildtype strain.

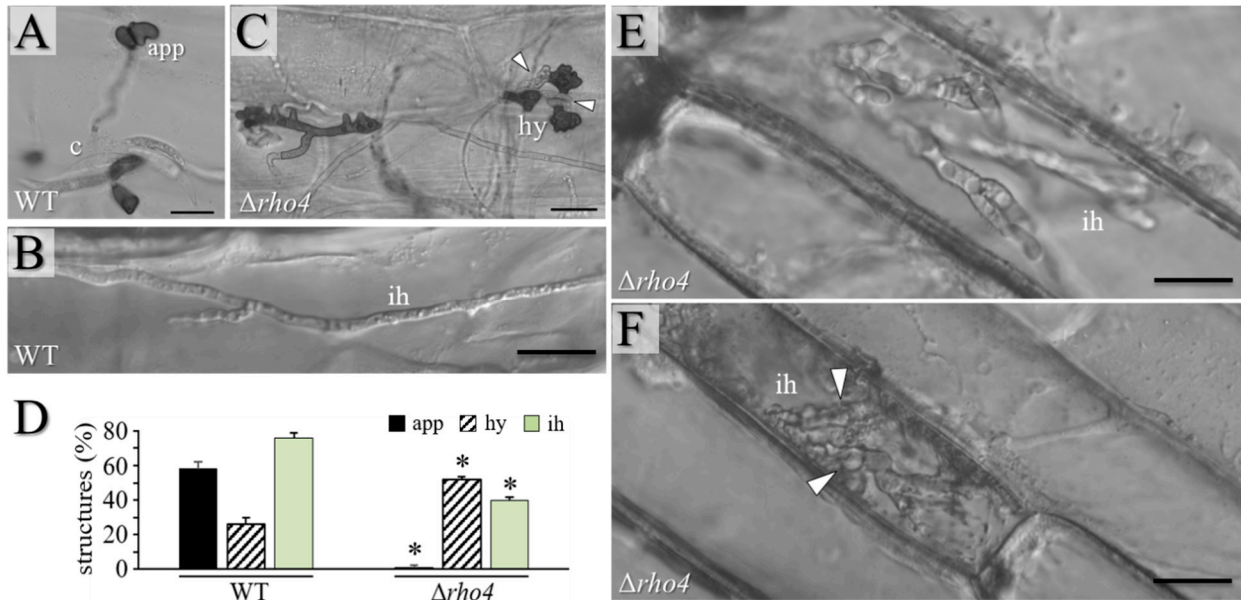

**Figure. S2.**  $\Delta\rho\text{ho}4$  mutants differentiate defective infection structures on the alternative host, *Allium cepa* cv. Shakespeare. **(A)** Conidia (c) of the *C. graminicola* WT strain germinate and differentiate in appressoria (app) and hyphopodia (D) on onion epidermal cells. **(B)** WT infection hypha (ih) formed after invading the onion epidermis. **(C)** The  $\Delta\rho\text{ho}4$  mutant differentiates hyphopodia (hy), which show lateral germination (arrowheads). **(D)** Appressorium, hyphopodium, and infection hypha differentiation by WT and  $\Delta\rho\text{ho}4$  strains. Error bars are standard deviations; asterisk indicates statistically significant differences of corresponding structures (T-test,  $P \leq 0.05$ ). **(E and F)** In planta differentiated infection hyphae (ih) of the  $\Delta\rho\text{ho}4$  strain.  $\Delta\rho\text{ho}4$  infection hyphae densely colonize the host cell, with swellings indicative of cell wall defects (ih, arrowheads). Microscopy was done at 72 hpi. Size bars in (A – C, E and F) are 20  $\mu\text{m}$ .
